# Supplementary material for: Surveillance, Epidemiology and Impact of EV-A71 Vaccination on Hand, Foot, and Mouth Disease in Nanchang, China, 2010–2019
Source: PubMed Central journal article supplement (PMC8770912; doi:10.3389/fmicb.2021.811553), 2022-01-06
Supplement: Table_1.pdf [file Table_1.pdf]

Supplementary Table 1. Strains used for molecular analysis of CV-A6

| Isolation year | Countries | Strain name             | GenBank accession No. | Genotype/<br>Sub-genotype | Origin  |
|----------------|-----------|-------------------------|-----------------------|---------------------------|---------|
| 1949           | USA       | Gdula                   | AY421764              | A                         | GenBank |
| 2004           | China     | AFP560/GD/CHN/2004      | KP143074              | B                         | GenBank |
| 2005           | China     | AFP262/GD/CHN/2004      | KP143075              | B                         | GenBank |
| 1996           | China     | 96188/SD/CHN/1996       | JQ464887              | C                         | GenBank |
| 1999           | Japan     | Kyoto1                  | AB779614              | D1                        | GenBank |
| 1999           | Japan     | Hyogo1278               | LC126143              | D1                        | GenBank |
| 2008           | Spain     | ESP08/1023              | FR797988              | D1                        | GenBank |
| 2010           | France    | CF165026FRA             | HE572917              | D1                        | GenBank |
| 2010           | France    | CF181032FRA             | HE572935              | D1                        | GenBank |
| 2009           | China     | JB143090122             | KC866916              | D2                        | GenBank |
| 2009           | China     | JB143090119             | KC866921              | D2                        | GenBank |
| 2009           | Japan     | Kyoto4                  | AB779617              | D2                        | GenBank |
| 2010           | China     | 10032/SD/CHN/2020       | JQ364889              | D2                        | GenBank |
| 2010           | China     | CV6-SHZH2010-0601       | JX154921              | D2                        | GenBank |
| 2011           | China     | HN421/HN/CHN/2011       | JN797598              | D2                        | GenBank |
| 2011           | China     | CVA6-SHZH2011-0507      | JX473340              | D2                        | GenBank |
| 2011           | China     | SHAPHC11883/SH/CHN/2011 | JX495130              | D2                        | GenBank |
| 2011           | China     | 075/GS/CHN/2011         | KY211690              | D2                        | GenBank |
| 2013           | China     | A023/YN/CHN/2013        | KY424358              | D2                        | GenBank |
| 2013           | China     | 13-97/JL/CHN/2013       | KY424390              | D2                        | GenBank |
| 2011           | Japan     | Shizuoka 1              | AB649286              | D3                        | GenBank |
| 2008           | Spain     | ESP08/54694             | FR79984               | D3                        | GenBank |
| 2010           | China     | 10MF66 Q4 JS            | KJ577275              | D3                        | GenBank |
| 2010           | China     | CVA6/SHZH2010-0905      | JX154931              | D3                        | GenBank |
| 2010           | China     | 10MF67 JS/CHN/2010      | KJ577276              | D3                        | GenBank |
| 2010           | France    | CF140007FRA             | HE572906              | D3                        | GenBank |
| 2010           | France    | CF175076FRA             | HE572928              | D3                        | GenBank |
| 2010           | France    | CF194028FRA             | HE572938              | D3                        | GenBank |
| 2010           | China     | TW/409/2010             | JQ946055              | D3                        | GenBank |
| 2011           | China     | CVA6/SHZH2011-0701      | JX473370              | D3                        | GenBank |
| 2013           | China     | 13-87/SaX/CHN/2013      | KY424394              | D3                        | GenBank |
| 2013           | China     | 13-28/ZJ/CHN/2013       | KY424409              | D3                        | GenBank |
| 2013           | China     | TJ13-54-C/CHN/2013      | KJ848308              | D3                        | GenBank |
| 2014           | China     | 14-106/JX/CHN/2014      | KY424385              | D3                        | GenBank |
| 2014           | China     | 14-106/HuN/CHN/2014     | KY424386              | D3                        | GenBank |
| 2015           | China     | SHAPHC5896/SH/CHN/2015  | KU736939              | D3                        | GenBank |
| 2017           | China     | 2017-CA6-482            | MG385817              | D3                        | GenBank |
| 2017           | China     | 538/GD/CH/2017          | MG385818              | D3                        | GenBank |
| 2017           | China     | 60/GD/CH/2017           | MG385819              | D3                        | GenBank |

| Isolation year     | Countries | Strain name                                             | GenBank accession No.                                                     | Genotype/<br>Sub-genotype | Origin     |
|--------------------|-----------|---------------------------------------------------------|---------------------------------------------------------------------------|---------------------------|------------|
| 2017               | China     | 91/GD/CHN/2017                                          | MG385831                                                                  | D3                        | GenBank    |
| 2017               | China     | 703/GD/CHN/2017                                         | MG385829                                                                  | D3                        | GenBank    |
| 2017               | China     | 482/GD/CH/2017                                          | MG385817                                                                  | D3                        | GenBank    |
| 2013,<br>2015-2019 | China     | 106 representative CV-A6 strains identified in Nanchang | MW075633-<br>MW075642;<br>OL677506-<br>OL677510;<br>OL688664-<br>OL688754 | D3                        | This study |
